# Supplementary material
Source: publisher site journal article supplement (https://www.dovepress.com/article/301705)
Supplement: Supplementary file 1 [file get_supplementary_file.php]

| **Table S1** Parameters used in different magnetic resonance imaging sequences. | | | |
| --- | --- | --- | --- |
| Sequence/ | T1WI | T2WI | DWI |
| Acquisition mode | 3D | 2D | 2D |
| Repetition time (ms) | 6.66 | 2982.9 | 10300 |
| Echo time (ms) | 2 | 86 | 60 |
| Flip angle (°) | 10 | 160 | 180 |
| Fat suppression | Dixon | SPAIR | SPAIR |
| Acquisition time (s) | 272 | 274 | 494 |
| DWI, diffusion-weighted imaging; T1WI, T1-weighted imaging; T2WI, T2-weighted imaging. | | | |

| **Table S2** Patient characteristics. | | | | |
| --- | --- | --- | --- | --- |
| Number | Age (years) | Side | Date of Surgery (month/day/year) | Acquisition date of CT and MR images (month/day/year) |
| 1 | 46 | Right | 07/10/2018 | 08/26/2018 |
| 2 | 39 | Right | 08/24/2018 | 09/26/2018 |
| 3 | 39 | Left | 08/15/2018 | 09/26/2018 |
| 4 | 48 | Right | 09/17/2018 | 10/16/2018 |
| 5 | 42 | Left | 09/19/2018 | 10/22/2018 |
| 6 | 33 | Left | 09/23/2018 | 10/31/2018 |
| 7 | 56 | Left | 09/19/2018 | 11/05/2018 |
| 8 | 49 | Left | 10/09/2018 | 11/12/2018 |
| 9 | 37 | Right | 10/31/2018 | 11/23/2018 |
| 10 | 48 | Left | 10/15/2018 | 12/04/2018 |
| 11 | 48 | Left | 11/07/2018 | 12/10/2018 |
| 12 | 41 | Right | 11/23/2018 | 12/17/2018 |
| 13 | 48 | Left | 11/30/2018 | 12/27/2018 |
| 14 | 68 | Left | 11/26/2018 | 01/01/2019 |
| 15 | 73 | Right | 12/17/2018 | 01/18/2019 |
| 16 | 55 | Right | 12/28/2018 | 01/30/2019 |
| 17 | 61 | Right | 01/03/2019 | 02/21/2019 |
| 18 | 42 | Left | 01/30/2019 | 02/25/2019 |
| 19 | 48 | Left | 01/21/2019 | 02/28/2019 |
| 20 | 46 | Right | 01/24/2019 | 03/07/2019 |
